# Supplementary material for: Treatment with tumour necrosis factor inhibitors is associated with a time-shifted retardation of radiographic spinal progression in patients with axial spondyloarthritis
Source: HighWire-hosted journal article supplement (doi:10.1136/annrheumdis-2022-222324), 2022-06-13
Supplement: annrheumdis-2022-222324supp001_data_supplement.pdf [file annrheumdis-2022-222324supp001_data_supplement.pdf]

Treatment with tumour necrosis factor inhibitors is associated with a time-shifted retardation of radiographic spinal progression in patients with axial spondyloarthritis

Murat Torgutalp, Valeria Rios Rodriguez, Ani Dilbaryan, Fabian Proft, Mikhail Protopopov, Maryna Verba, Judith Rademacher, Hildrun Haibel, Joachim Sieper, Martin Rudwaleit, Denis Poddubnyy

Supplementary Table S1. The reliability of mSASSS status score as reflected by intraclass correlation coefficients.

|    | Year 0              |                     | Year 2              |                     | Year 4              |                     | Year 6              |                     | Year 8              |                     | Year 10             |                     |
|----|---------------------|---------------------|---------------------|---------------------|---------------------|---------------------|---------------------|---------------------|---------------------|---------------------|---------------------|---------------------|
|    | R2                  | R3                  |
| R1 | 0.97<br>(0.96-0.97) | 0.95<br>(0.93-0.96) | 0.97<br>(0.96-0.98) | 0.95<br>(0.94-0.96) | 0.97<br>(0.96-0.98) | 0.92<br>(0.88-0.94) | 0.95<br>(0.93-0.97) | 0.92<br>(0.89-0.94) | 0.92<br>(0.87-0.95) | 0.92<br>(0.87-0.95) | 0.93<br>(0.89-0.95) | 0.91<br>(0.87-0.94) |
| R2 | -                   | 0.93<br>(0.9-0.94)  | -                   | 0.93<br>(0.91-0.95) | -                   | 0.90<br>(0.86-0.93) | -                   | 0.88<br>(0.83-0.92) | -                   | 0.84<br>(0.74-0.9)  | -                   | 0.90<br>(0.84-0.93) |

Supplementary Table S2. The reliability of mSASSS change score as reflected by the intraclass correlation coefficients.

|    | Year 0-Year 2       |                     | Year 2-Year 4       |                      | Year 4-Year 6       |                     | Year 6-Year 8      |                     | Year 8-Year 10      |                      |
|----|---------------------|---------------------|---------------------|----------------------|---------------------|---------------------|--------------------|---------------------|---------------------|----------------------|
|    | R2                  | R3                  | R2                  | R3                   | R2                  | R3                  | R2                 | R3                  | R2                  | R3                   |
| R1 | 0.84<br>(0.79-0.88) | 0.72<br>(0.63-0.79) | 0.61<br>(0.42-0.73) | 0.31<br>(-0.01-0.53) | 0.60<br>(0.36-0.75) | 0.50<br>(0.19-0.68) | 0.61<br>(0.26-0.8) | 0.84<br>(0.69-0.91) | 0.52<br>(0.04-0.76) | 0.54<br>(0.08-0.77)  |
| R2 | -                   | 0.83<br>(0.77-0.87) | -                   | 0.61<br>(0.42-0.73)  | -                   | 0.66<br>(0.45-0.79) | -                  | 0.55<br>(0.14-0.76) | -                   | 0.34<br>(-0.33-0.67) |

**Supplementary Table S3. Progression in mSASSS in the whole axSpA group and in the subgroups according to ASDAS-CRP categories based on different definitions of TNFi exposure.**

|                                   | TNFi exposure definition*                   |                           |                                                          |                           |                                              |                           |                                                           |                           |                                                                                               |                           |
|-----------------------------------|---------------------------------------------|---------------------------|----------------------------------------------------------|---------------------------|----------------------------------------------|---------------------------|-----------------------------------------------------------|---------------------------|-----------------------------------------------------------------------------------------------|---------------------------|
|                                   | Any TNFi use in the current 2-year interval |                           | TNFi for $\geq 12$ months in the current 2-year interval |                           | Any TNFi use in the previous 2-year interval |                           | TNFi for $\geq 12$ months in the previous 2-year interval |                           | TNFi for $\geq 12$ months in the previous and $\geq 12$ months in the current 2-year interval |                           |
|                                   | No                                          | Yes                       | No                                                       | Yes                       | No                                           | Yes                       | No                                                        | Yes                       | No                                                                                            | Yes                       |
| <b>All patients</b>               | 0.73 $\pm$ 1.47<br>(n=394)                  | 0.88 $\pm$ 1.71<br>(n=99) | 0.77 $\pm$ 1.53<br>(n=417)                               | 0.70 $\pm$ 1.47<br>(n=76) | 0.82 $\pm$ 1.58<br>(n=398)                   | 0.55 $\pm$ 1.29<br>(n=70) | 0.83 $\pm$ 1.61<br>(n=421)                                | 0.37 $\pm$ 0.61<br>(n=47) | 0.79 $\pm$ 1.57<br>(n=463)                                                                    | 0.35 $\pm$ 0.63<br>(n=39) |
| <b>ASDAS Category**</b>           |                                             |                           |                                                          |                           |                                              |                           |                                                           |                           |                                                                                               |                           |
| <b>Inactive Disease</b>           | 0.72 $\pm$ 1.50<br>(n=48)                   | 1.06 $\pm$ 1.70<br>(n=28) | 0.87 $\pm$ 1.60<br>(n=52)                                | 0.81 $\pm$ 1.55<br>(n=24) | 1.03 $\pm$ 1.67<br>(n=49)                    | 0.65 $\pm$ 1.51<br>(n=21) | 1.07 $\pm$ 1.76<br>(n=56)                                 | 0.29 $\pm$ 0.57<br>(n=14) | 0.92 $\pm$ 1.66<br>(n=66)                                                                     | 0.28 $\pm$ 0.59<br>(n=13) |
| <b>Low Disease Activity</b>       | 0.62 $\pm$ 1.44<br>(n=130)                  | 0.56 $\pm$ 1.19<br>(n=37) | 0.60 $\pm$ 1.40<br>(n=137)                               | 0.64 $\pm$ 1.30<br>(n=30) | 0.65 $\pm$ 1.48<br>(n=132)                   | 0.36 $\pm$ 0.65<br>(n=26) | 0.63 $\pm$ 1.45<br>(n=138)                                | 0.42 $\pm$ 0.65<br>(n=20) | 0.62 $\pm$ 1.41<br>(n=157)                                                                    | 0.38 $\pm$ 0.66<br>(n=14) |
| <b>High Disease Activity</b>      | 0.63 $\pm$ 1.06<br>(n=184)                  | 0.83 $\pm$ 1.78<br>(n=24) | 0.64 $\pm$ 1.09<br>(n=191)                               | 0.80 $\pm$ 1.87<br>(n=17) | 0.66 $\pm$ 1.10<br>(n=183)                   | 0.80 $\pm$ 1.86<br>(n=17) | 0.69 $\pm$ 1.20<br>(n=190)                                | 0.43 $\pm$ 0.72<br>(n=10) | 0.66 $\pm$ 1.18<br>(n=200)                                                                    | 0.44 $\pm$ 0.76<br>(n=9)  |
| <b>Very High Disease Activity</b> | 1.71 $\pm$ 2.76<br>(n=32)                   | 1.63 $\pm$ 2.84<br>(n=10) | 1.90 $\pm$ 2.87<br>(n=37)                                | 0.20 $\pm$ 0.18<br>(n=5)  | 2.03 $\pm$ 2.96<br>(n=34)                    | 0.28 $\pm$ 0.25<br>(n=6)  | 1.90 $\pm$ 2.87<br>(n=37)                                 | 0.22 $\pm$ 0.19<br>(n=3)  | 1.87 $\pm$ 2.81<br>(n=40)                                                                     | 0.22 $\pm$ 0.19<br>(n=3)  |

\* For all definitions of progression, available data regarding ASDAS in the current interval and data on TNFi exposure in the corresponding interval were used. The numerical differences regarding TNFi exposure between the current and the previous interval were due to missing information on TNFi in the previous interval.

\*\* Based on the time-averaged ASDAS in the current 2-year interval

ASDAS, Ankylosing Spondylitis Disease Activity Score; CRP, C-Reactive Protein; mSASSS, Modified stoke ankylosing spondylitis spinal score; TNFi, tumour necrosis factor alpha inhibitor.

**Supplementary figure S1. Flowchart of the selection of included patients in the present analysis from the German SPondyloarthritis Inception Cohort (GESPIC).**

axSpA, axial Spondyloarthritis.

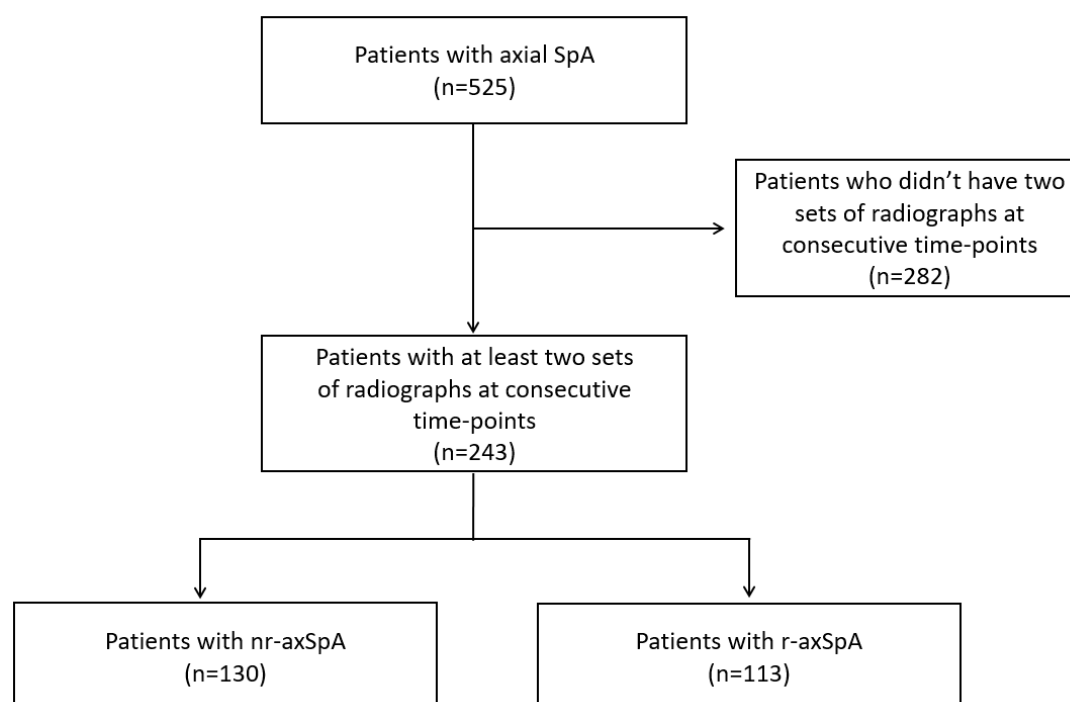

Supplementary figure S2. A diagram to conceptualize the effect of TNFi exposure on spinal radiographic progression in the causal mediation analysis.

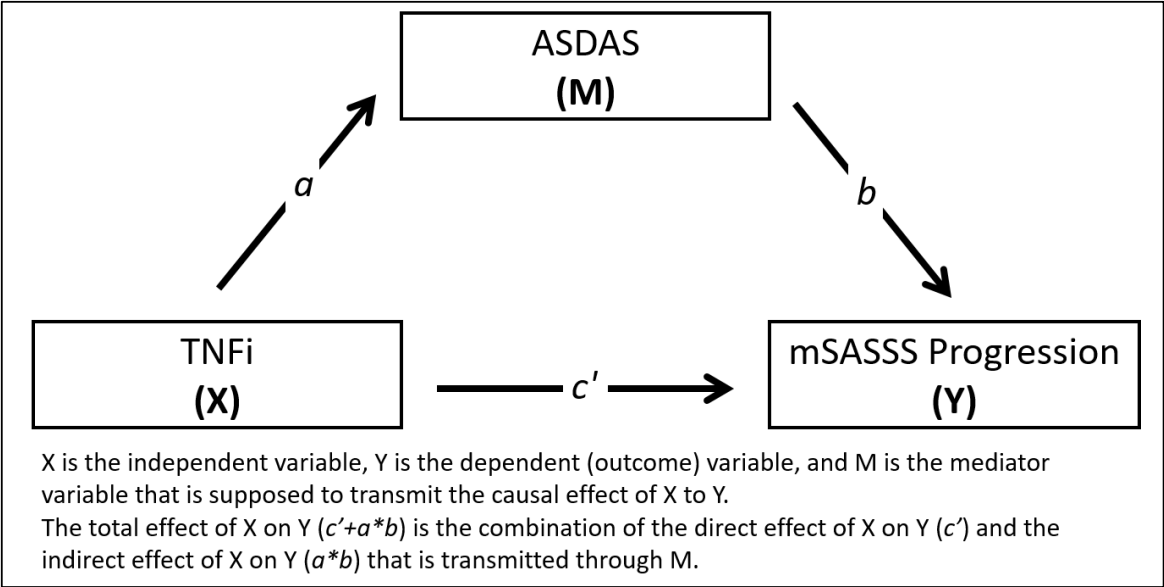

ASDAS, Ankylosing Spondylitis Disease Activity Score; mSASSS, modified Stoke Anylosing Spondylitis Spine Score; TNFi, tumour necrosis factor alpha inhibitor.

**Supplementary figure S3. The distribution of the intervals with respect to the definitions of the TNFi exposure of included 243 patients who contributed a total of 531 two-year radiographic intervals.**

TNFi, tumour necrosis factor alpha inhibitor.

| Timepoints<br>years                                                                    | Y0                     | Y2                     | Y4                    | Y6                    | Y8                    | Y10              |
|----------------------------------------------------------------------------------------|------------------------|------------------------|-----------------------|-----------------------|-----------------------|------------------|
|                                                                                        | 1. Interval<br>(n=218) | 2. Interval<br>(n=126) | 3. Interval<br>(n=88) | 4. Interval<br>(n=55) | 5. Interval<br>(n=44) | TOTAL<br>(n=531) |
| Any TNFi use in current<br>2-year interval (Yes/No)                                    | 30 / 188               | 20 / 106               | 16 / 72               | 19 / 36               | 18 / 26               | 103 / 428        |
| TNFi ≥ 12 months in current<br>2-year interval (Yes/No)                                | 11 / 207               | 17 / 109               | 13 / 75               | 19 / 36               | 18 / 26               | 78 / 453         |
| Any TNFi use in previous<br>2-year interval (Yes/No)                                   | 8 / 210                | 20 / 86<br>20*         | 16 / 67<br>5*         | 13 / 40<br>2*         | 16 / 26<br>2*         | 73 / 429<br>29*  |
| TNFi ≥ 12 months in previous<br>2-year interval (Yes/No)                               | 0 / 218                | 10 / 96<br>20*         | 14 / 69<br>5*         | 9 / 44<br>2*          | 16 / 26<br>2*         | 49 / 453<br>29*  |
| TNFi ≥ 12 months in previous<br>and ≥ 12 months in current<br>2-year interval (Yes/No) | 0 / 218                | 9 / 117                | 11 / 77               | 8 / 47                | 17 / 27               | 45 / 486         |

\* refers to the missing information regarding TNFi exposure in the previous interval.
